# Supplementary material for: Modeling hepatitis C virus kinetics during liver transplantation reveals the role of the liver in virus clearance
Source: eLife. 2021 Nov 3;10:e65297. doi: 10.7554/eLife.65297 (PMC8608386; doi:10.7554/eLife.65297)
Supplement: Figure 3—source data 1. — Also includes patients demographics, fluid intake/uptake, and timing of the anhepatic phase. [file elife-65297-fig3-data1.csv]

Case	Time	VL		Case	hcv genotype	Gender	Weight [kg]	BMI [kg/m^2]	Age at LT [yr]	Donor age [yr]	Donor gender	HCV genotype	AH fluid intake [mL]	RP fluid intake [mL]	Start time of Anhepatic Phase	Duration of Anhepatic Phase	End time of Anhepatic Phase
Case 1	0.01	6.34		1	1b	M	88	30	68	72	M	1b	0	0	0.83	1.77	2.6
Case 1	0.41	6.29		2	1b	F	70	31	66	33	M	1b	500	1000	1.3	1.25	2.63
Case 1	0.66	6.27		3	3	M	87	34	56	69	M	3	250	250	1.16	1.5	2.66
Case 1	0.93	6.37		4	1b	F	43	19	60	73	F	1b	750	3300	1	1.9	2.9
Case 1	1.083	6.35		5	1b	M	90	29	49	29	M	1b	951	3350	0.97	1.66	2.63
Case 1	1.28	6.36
Case 1	1.5	6.25
Case 1	1.63	6.28
Case 1	1.833	6.32
Case 1	1.9833	6.25
Case 1	2.2	6.3
Case 1	2.66	5.81
Case 1	2.75	5.64
Case 1	2.87	5.48
Case 1	2.96	5.21
Case 1	3.06	5.07
Case 1	3.2	5.31
Case 1	3.333	5.34
Case 1	3.58	5.07
Case 1	3.667	5.14
Case 1	3.75	4.85
Case 1	3.85	4.91
Case 1	4.08	4.93
Case 1	4.25	4.68
Case 1	4.42	4.19
Case 1	5.33	4.95
Case 1	6.33	4.39
Case 1	7.33	4.32
Case 1	8.33	4.11
Case 1	9.33	3.9
Case 1	10.333	3.89
Case 1	16.33	3.42
Case 1	27.833	3.59
Case 1	33.833	4.28
Case 1	39.8333	4.44
Case 1	58.8333	4.37
Case 1	82.833	4.85
Case 1	106.833	4.95
Case 1	130.833	4.2
Case 1	154.83	4.48
Case 1	720	5.2
Case 1	2160	5.84
Case 2	0.01	5.87
Case 2	0.16	5.98
Case 2	1.16	6.04
Case 2	1.33	6.3
Case 2	1.5	6.17
Case 2	1.66	6.17
Case 2	1.833	5.7
Case 2	2	5.95
Case 2	2.16667	5.99
Case 2	2.42	5.98
Case 2	2.63	6.01
Case 2	2.7	5.57
Case 2	2.78	5.44
Case 2	2.91	5.5
Case 2	3	5.51
Case 2	3.08	5.5
Case 2	3.166	5.52
Case 2	3.25	5.4
Case 2	3.45	5.31
Case 2	3.533	5.28
Case 2	3.6667	5.26
Case 2	3.767	5.23
Case 2	3.95	5.09
Case 2	4.13	5
Case 2	4.3	5.04
Case 2	4.5	5.01
Case 2	4.75	4.82
Case 2	4.96	4.89
Case 2	5.25	4.68
Case 2	5.83	4.57
Case 2	6.05	4.21
Case 2	6.25	4.53
Case 2	6.667	4.5
Case 2	6.91	4.45
Case 2	7.58	4.05
Case 2	8.58	3.96
Case 2	9.58	3.89
Case 2	10.66	3.81
Case 2	11.66	3.45
Case 2	12.666	3.74
Case 2	18.66	3.65
Case 2	24.667	3.83
Case 2	30.666	4.21
Case 2	36.666	4.29
Case 2	42.666	4.47
Case 2	66.666	4.43
Case 2	90.666	5.66
Case 2	114.666	5.1
Case 2	138.666	5.85
Case 2	720	6.6755
Case 2	2160	6.62
Case 3	0.08	5.22
Case 3	1.08	5.31
Case 3	1.33	5.41
Case 3	1.5	5.39
Case 3	1.66	5.37
Case 3	1.82	5.26
Case 3	2.07	5.34
Case 3	2.32	5.35
Case 3	2.48	5.32
Case 3	2.6	5.32
Case 3	2.73	4.81
Case 3	2.81	4.87
Case 3	2.89	4.75
Case 3	3	4.65
Case 3	3.08	4.64
Case 3	3.16	4.56
Case 3	3.24	4.54
Case 3	3.35	4.53
Case 3	3.44	4.22
Case 3	3.56	4.66
Case 3	3.66	4.69
Case 3	3.72	4.55
Case 3	3.92	4.52
Case 3	5.13	4.1
Case 3	6.13	3.95
Case 3	7.13	3.7
Case 3	8.13	3.75
Case 3	9.13	3.03
Case 3	10.13	3.56
Case 3	16.13	3.02
Case 3	22.13	2.69
Case 3	28.13	4.42
Case 3	52.13	5.5
Case 3	76.13	6.16
Case 3	100	6.72
Case 3	124	7.33
Case 3	720	6.82
Case 4	0.01	6.34
Case 4	0.83	6.4
Case 4	1	6.39
Case 4	1.16	6.33
Case 4	1.31	6.25
Case 4	1.52	6.19
Case 4	1.65	6.19
Case 4	1.78	6.24
Case 4	1.9	6.05
Case 4	2.12	6.01
Case 4	2.23	5.94
Case 4	2.39	5.91
Case 4	2.55	5.89
Case 4	2.72	5.87
Case 4	2.92	5.72
Case 4	3	5.6
Case 4	3.08	5.46
Case 4	3.16	5.46
Case 4	3.26	5.42
Case 4	3.32	5.4
Case 4	3.39	5.38
Case 4	3.47	5.38
Case 4	3.53	5.37
Case 4	3.62	5.12
Case 4	3.7	5.3
Case 4	3.78	5.34
Case 4	3.94	5.27
Case 4	4.04	5.15
Case 4	4.2	5.05
Case 4	4.36	4.65
Case 4	4.52	4.65
Case 4	6.52	4.37
Case 4	7.52	4.31
Case 4	8.52	4.27
Case 4	9.52	4.29
Case 4	10.52	4.15
Case 4	11.52	3.98
Case 4	17.52	3.63
Case 4	23.52	5.55
Case 4	29.52	5.42
Case 4	35.52	5.63
Case 4	45	5.77
Case 4	69	6.56
Case 4	93	6.74
Case 4	117	5.51
Case 4	141	6.96
Case 4	1080	8.146
Case 5	0.13333	3.75
Case 5	0.75	3.71
Case 5	0.9666	3.65
Case 5	1.11	3.64
Case 5	1.3	3.41
Case 5	1.45	3.59
Case 5	1.61	3.47
Case 5	1.78	3.54
Case 5	1.98	3.45
Case 5	2.133	3.48
Case 5	2.3	3.29
Case 5	2.48	3.41
Case 5	2.56	3.39
Case 5	2.83	3.48
Case 5	2.9	3.28
Case 5	3	3.22
Case 5	3.08	3.36
Case 5	3.16	3.36
Case 5	3.25	3.26
Case 5	3.35	3.31
Case 5	3.43	3.28
Case 5	3.51	3.34
Case 5	3.6	3.3
Case 5	3.68	3.23
Case 5	3.76	3.21
Case 5	3.93	3.27
Case 5	4.08	3.27
Case 5	4.25	3.21
Case 5	4.41	3.25
Case 5	4.58	3.21
Case 5	4.76	3.25
Case 5	4.91	3.24
Case 5	5.08	3.18
Case 5	5.26	3.25
Case 5	6.67	3.32
Case 5	7.66	3.2
Case 5	8.66	3.14
Case 5	9.66	3
Case 5	10.6	2.95
Case 5	11.6	2.4
Case 5	17.6	2.79
Case 5	29.6	2.46
Case 5	41.6	2.34
Case 5	65.6	2.45
Case 5	89.6	2.19
Case 5	137.6	2.78
