# Supplementary material for: Modeling hepatitis C virus kinetics during liver transplantation reveals the role of the liver in virus clearance
Source: eLife. 2021 Nov 3;10:e65297. doi: 10.7554/eLife.65297 (PMC8608386; doi:10.7554/eLife.65297)
Supplement: Figure 4—source data 1. [file elife-65297-fig4-data1.xlsx]

## Sheet: Figure 4 source data
Figure 4a									Figure 4b
time	Extracellular HCV RNA								time	Extracellular HCV RNA
	NoCell exp1		NoCell exp2		average across experiments (graphed in figure 4A)					Mock (all exp data normalized to 1x10^7)	DCV Exp1		DCV exp2		DCV exp3	NG exp1		NG exp2		average across experiments (graphed in figure 4B)
	ave (4 replicates)	std dev	ave (4 replicates)	std dev	ave	std dev					AVE. (duplicates)	std dev	AVE. (duplicates)	std dev	DCV (singlet)	AVE. (duplicates)	std dev	AVE. (duplicates)	std dev	ave	std dev
6	6.99251e+07	1.39602e+07	59000000	8.2369e+06	6.44626e+07	7.72524e+06			0	10000000	10000000	1330000	10000000	1.95528e+06	10000000	10000000	1.95464e+06	10000000	1330000	10000000	0
9	5.22778e+07	5.67839e+06	63600000	9.21089e+06	5.79389e+07	8.006e+06			2	10000000			1.28622e+07	2.16271e+06	1.35817e+07	1.67379e+07	9.27846e+06			1.4394e+07	2.06158e+06
12	3.76665e+07	5.79793e+06	64300000	4.2202e+07	5.09832e+07	1.88328e+07			4	10000000	6860000	982000			1.10436e+07	1.60869e+07	3.7866e+06	4870000	1990000	9.71511e+06	4.96624e+06
15	5.13411e+07	1.01732e+07	45100000	3.0605e+06	4.82206e+07	4.41314e+06			6	10000000			7.30045e+06	428260		7.10251e+06	316678			7.20148e+06	139967
18	7.70434e+07	8.85756e+06	55100000	3.02892e+06	6.60717e+07	1.55163e+07			9	10000000	5900000	1010000	8.59331e+06	2.24328e+06	4.71589e+06	4.98761e+06	2.33656e+06	8440000	570000	6.52736e+06	1.86897e+06
24	5.28649e+07	1.73077e+07	49000000	9.48458e+06	5.09325e+07	2.73293e+06			12	10000000	7330000	2310000	8.92228e+06	5.25319e+06	5.59692e+06	7.95387e+06	1.99424e+06	2210000	483000	6.40261e+06	2.63829e+06
30	5.10243e+07	2.75375e+06	71400000	2.94979e+07	6.12122e+07	1.44078e+07			16	10000000	4970000	1190000	5.19906e+06	1.16046e+06	5.20047e+06	8.27719e+06	2.59038e+06	5350000	43000	5.79934e+06	1.3918e+06
36	6.42734e+07	1.04769e+07	7.41431e+07	7.64633e+06	6.92082e+07	6.97891e+06			20	10000000	5410000	2230000	3.31207e+06	542355	6.80865e+06	2.88211e+06	185127	6310000	683000	4.94456e+06	1.76597e+06
48	5.61709e+07	5.92824e+06	5.35025e+07	1.98555e+07	5.48367e+07	1.88682e+06			24	10000000	2740000	287000						1900000	(singlet)	2320000	593970
56	5.43491e+07	1.23293e+07	5.66462e+07	6.03632e+06	5.54976e+07	1.62429e+06			28	10000000	3410000	1150000	2.38526e+06	904472	4.43354e+06	2.66401e+06	1.49235e+06	2110000	300000	3.00056e+06	936217
72	3.96311e+07	6.75023e+06	2.85171e+07	5.09496e+06	3.40741e+07	7.85879e+06			32	10000000	3090000	(singlet)	666222	2271.85	940820	1.08272e+06	28794.1	1440000	329000	1.44395e+06	961507
80			3.98829e+07	1.16959e+07	3.98829e+07	1.16959e+07			36	10000000	2320000	420000	1.23218e+06	431222	1.086e+06	1.55833e+06	757087	1540000	553000	1.5473e+06	476797
96			3.15244e+07	6.3524e+06	3.15244e+07	6.3524e+06			42	10000000	919000	294000	2.26347e+06	752763	1.6334e+06	1.82407e+06	661986	611000	14600	1.45019e+06	674754
120			3.01341e+07	8.37285e+06	3.01341e+07	8.37285e+06			48	10000000	595000	124000			761922			1120000	194000	825641	268237
144			2.67272e+07	5.11666e+06	2.67272e+07	5.11666e+06			54	10000000	746000	155000			607359			341000	31300	564786	205829
152			1.98623e+07	4.65338e+06	1.98623e+07	4.65338e+06			60	10000000	255000	8780			368660			757000	65600	460220	263227
176			2.76249e+07	2.24222e+06	2.76249e+07	2.24222e+06			66	10000000	389000	67800			560949			607000	148000	518983	114899
192			1.78493e+07	6.03627e+06	1.78493e+07	6.03627e+06
216			1.7363e+07	2.90658e+06	1.7363e+07	2.90658e+06

## Sheet: half-life calculations
Figure 4a		Using beta (regression) =			111.514			Figure 4b		Using beta (regression) =			13.0469
time	ln(predict)			predict				time	ln(predict)			predict
	Predicted Value	LCL	UCL	Predicted Value	LCL	UCL			Predicted Value	LCL	UCL	Predicted Value	LCL	UCL
6	17.9503	17.5295	18.371	6.24764e+07	4.10171e+07	9.51533e+07		0	16.2156	15.3896	17.0415	1.10242e+07	4.82634e+06	2.51785e+07
9	17.9316	17.5115	18.3518	6.1319e+07	4.02854e+07	9.33438e+07		2	16.1093	15.2849	16.9337	9.91243e+06	4.34658e+06	2.26054e+07
12	17.913	17.4934	18.3326	6.0189e+07	3.95628e+07	9.15687e+07		4	16.0031	15.1801	16.826	8.9137e+06	3.91412e+06	2.02973e+07
15	17.8943	17.4753	18.3134	5.90739e+07	3.88532e+07	8.98273e+07		6	15.8968	15.0752	16.7184	8.0148e+06	3.52433e+06	1.82267e+07
18	17.8757	17.4571	18.2942	5.79853e+07	3.81524e+07	8.81191e+07		9	15.7374	14.9175	16.5573	6.83386e+06	3.01015e+06	1.55147e+07
24	17.8384	17.4207	18.256	5.58623e+07	3.67887e+07	8.48164e+07		12	15.578	14.7596	16.3965	5.82693e+06	2.57047e+06	1.32102e+07
30	17.8011	17.3842	18.218	5.3817e+07	3.54701e+07	8.16539e+07		16	15.3655	14.5486	16.1825	4.71142e+06	2.0815e+06	1.06652e+07
36	17.7638	17.3476	18.18	5.18466e+07	3.41953e+07	7.86093e+07		20	15.153	14.3371	15.969	3.80947e+06	1.6847e+06	8.61487e+06
48	17.6892	17.2738	18.1046	4.81196e+07	3.17626e+07	7.29001e+07		24	14.9405	14.125	15.756	3.08018e+06	1.36273e+06	6.96216e+06
56	17.6395	17.2244	18.0546	4.57865e+07	3.02317e+07	6.93447e+07		28	14.728	13.9125	15.5436	2.49051e+06	1.10185e+06	5.62989e+06
72	17.54	17.1247	17.9553	4.14501e+07	2.73629e+07	6.27896e+07		32	14.5155	13.6994	15.3316	2.01373e+06	890377	4.55438e+06
80	17.4903	17.0746	17.906	3.94404e+07	2.60258e+07	5.97691e+07		36	14.303	13.4858	15.1202	1.62822e+06	719132	3.68654e+06
96	17.3908	16.9735	17.8082	3.5705e+07	2.35233e+07	5.42005e+07		42	13.9842	13.1645	14.804	1.18375e+06	521518	2.68717e+06
120	17.2417	16.82	17.6633	3.07592e+07	2.01759e+07	4.68893e+07		48	13.6655	12.842	14.489	860699	377755	1.96107e+06
144	17.0925	16.6645	17.5205	2.64959e+07	1.72703e+07	4.06496e+07		54	13.3467	12.5184	14.175	625746	273320	1.4326e+06
152	17.0428	16.6122	17.4733	2.52112e+07	1.63903e+07	3.87755e+07		60	13.0279	12.1937	13.8622	454931	197541	1.0478e+06
176	16.8936	16.454	17.3331	2.17169e+07	1.39921e+07	3.37031e+07		66	12.7092	11.8679	13.5505	330777	142614	767198
192	16.7941	16.3475	17.2407	1.96601e+07	1.25785e+07	3.07285e+07
216	16.645	16.1864	17.1035	1.69368e+07	1.07069e+07	2.67889e+07
